# Supplementary material
Source: Elsevier journal article supplement (https://www.sciencedirect.com/science/article/pii/S2605073022000347)
Supplement: mmc1 [file S2605073022000347:mmc1.docx]

**FIGURAS**


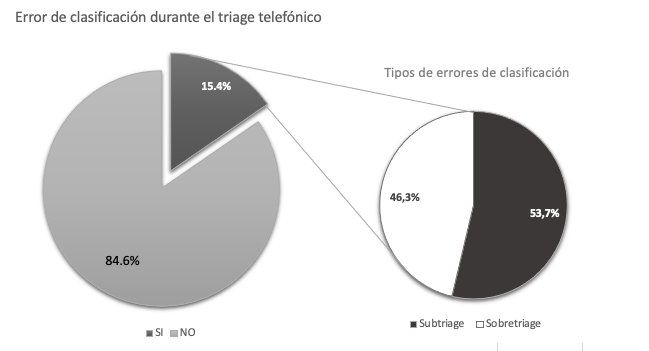


**Figura 1.** Porcentaje de error de clasificación en el total de los registros generados en una empresa que brinda atención médica domiciliaria en la ciudad de Medellín, Antioquia. Enero a junio, 2020

**Figura 2.** Porcentaje de error de clasificación según el mes de generación de los registros en una empresa que brinda atención médica domiciliaria en la ciudad de Medellín, Antioquia. Enero a junio, 2020

**Figura 3.** Presentación del error por semanas en una empresa que brinda atención médica domiciliaria en la ciudad de Medellín, Antioquia. Enero a junio, 2020

**Figura 4.** Porcentaje de error de clasificación por motivos de consulta agrupados en los registros en una empresa que brinda atención médica domiciliaria en la ciudad de Medellín, Antioquia. Enero a junio, 2020

**TABLAS**

**Tabla 1**. Descripción del personal asistencial y de las llamadas telefónicas según el error de clasificación durante el triaje telefónico en una empresa que brinda atención médica domiciliaria en la ciudad de Medellín, Antioquia. Enero a junio, 2020

| Características del personal asistencial | | | |
| --- | --- | --- | --- |
| Variable | Total n=58  No. (%) | Error de clasificación | |
| Si (n=28)  No (%) | No (n=30)  No (%) |
| Sexo  - Femenino  - Masculino | 40 (69.0)  18 (31.0) | 17 (60.7)  11 (39.3) | 23 (76.7)  7 (23.3) |
| Edad Mediana (RIC) | 26.5 (23 - 31) | 27 (23 – 35.5) | 24.5 (23 – 30) |
| Profesión  - Tecnología en atención prehospitalaria  - Técnico profesional en atención prehospitalaria  - Tecnología en atención prehospitalaria de urgencias, emergencias y desastres  - Auxiliar de enfermería  - Trabajo social | 37 (63.8)  11 (19.0)  4 (6.9)  5 (8.6)  1 (1.7) | 17 (60.7)  5 (17.9)  3 (10.7)  2 (7.1)  1 (3.6) | 20 (66.7)  6 (20.0)  1 (3.3)  3 (10.0)  0 |
| Experiencia laboral (años) Mediana (RIC) | 4 (2-7) | 4.5 (2 – 7.5) | 3 (2 – 7) |
| Experiencia en triaje telefónico (años) Mediana (RIC) | 2.6 (1.4 – 5.2) | 3.2 (1.6 – 6.5) | 2.3 (1.1 – 4.7) |
| Características de la llamada telefónica | | | |
| Variable | Total n=260  No. (%) | Error de clasificación | |
| Si (n=40)  No (%) | No (n=220)  No (%) |
| Duración de llamada Mediana (RIC) | 3.41 (2.59 – 4.70) | 3.34 (2.74 – 4.73) | 3.42 (2.57 – 4.70) |
| Persona que solicita el servicio  - Paciente  - Otro (familiar o acompañante) | 91 (35.0)  169 (65.0) | 10 (25.0)  30 (75.0) | 81 (36.8)  139 (63.2) |
| Rellamada del personal asistencial  - No  - Si | 243 (93.5)  17 (6.5) | 39 (97.5)  1 (2.5) | 204 (92.7)  16 (7.3) |
| Reclamo del paciente  - No  - Si | 245 (94.2)  15 (5.8) | 35 (87.5)  5 (12.5) | 210 (95.4)  10 (4.5) |
| Hora de generación  - Mañana (6:00-12:00)  - Tarde (12:00-18:00)  - Noche (18:00-24:00)  - Madrugada (24:00-6:00) | 74 (28.5)  93 (35.8)  79 (30.4)  14 (5.4) | 11 (27.5)  12 (30.0)  17 (42.5)  0 (0.0) | 63 (28.6)  81 (36.8)  62 (28.2)  14 (6.4) |
